# Supplementary material
Source: PubMed Central journal article supplement (PMC3739038)
Supplement: supp_blood-2013-01-481077_blood-2013-01-481077-1.pdf [file supp_blood-2013-01-481077_blood-2013-01-481077-1.pdf]

**Supplemental Table 1: Summary of assay characteristics of measured immune and inflammation markers (N=83)**

| Analyte      | Panel | LLOD  | % of Samples<br>Above LLOD | Median Concentration <sup>†</sup> |        | Within-batch<br>CV (%) <sup>‡</sup> ICC <sup>‡</sup> |      | Between-batch<br>CV (%) <sup>‡</sup> ICC <sup>‡</sup> |      |
|--------------|-------|-------|----------------------------|-----------------------------------|--------|------------------------------------------------------|------|-------------------------------------------------------|------|
|              |       |       |                            | Controls                          | Cases  |                                                      |      |                                                       |      |
| 6CKINE       | C17P2 | 78.1  | 86.7                       | 235.2                             | 270.2  | 3.4                                                  | 0.93 | 4.1                                                   | 0.89 |
| AMYLIN       | MH9   | 27.4  | 47.0                       | 13.7                              | 27.8   | 4.7                                                  | 0.80 | 7.0                                                   | 0.52 |
| BCA-1        | C17P2 | 1.0   | 100.0                      | 15.5                              | 18.9   | 7.5                                                  | 0.87 | 10.1                                                  | 0.77 |
| CCL19 MIP3B  | C7P3  | 2.4   | 99.8                       | 56.3                              | 62.7   | 3.5                                                  | 0.95 | 5.9                                                   | 0.86 |
| CCL20 MIP3A  | C7P3  | 2.4   | 62.5                       | 3.6                               | 3.8    | 9.7                                                  | 0.95 | 12.3                                                  | 0.92 |
| C-PEPTIDE    | MH9   | 68.6  | 99.5                       | 1807.6                            | 1890.7 | 0.8                                                  | 0.99 | 2.6                                                   | 0.94 |
| CTACK        | C17P2 | 1.2   | 100.0                      | 626.0                             | 648.3  | 2.1                                                  | 0.91 | 3.0                                                   | 0.80 |
| CXCL11 I-TAC | C7P3  | 2.0   | 99.8                       | 30.0                              | 30.7   | 4.0                                                  | 0.98 | 5.8                                                   | 0.96 |
| CXCL6 GCP2   | C7P3  | 2.4   | 99.8                       | 56.9                              | 60.5   | 3.4                                                  | 0.96 | 5.0                                                   | 0.91 |
| CXCL9 MIG    | C7P3  | 12.2  | 99.8                       | 464.4                             | 492.9  | 2.2                                                  | 0.97 | 4.1                                                   | 0.89 |
| EGF          | C22P1 | 3.2   | 86.0                       | 36.3                              | 38.7   | 3.0                                                  | 0.97 | 4.1                                                   | 0.95 |
| ENA-78       | C17P2 | 19.5  | 100.0                      | 632.3                             | 614.9  | 2.5                                                  | 0.98 | 3.1                                                   | 0.97 |
| EOTAXIN      | C22P1 | 3.2   | 99.8                       | 68.9                              | 69.3   | 5.1                                                  | 0.89 | 5.7                                                   | 0.86 |
| EOTAXIN-2    | C17P2 | 2.4   | 100.0                      | 778.5                             | 855.8  | 2.5                                                  | 0.99 | 3.4                                                   | 0.97 |
| FGF-2        | C22P1 | 16.0  | 25.6                       | 8.0                               | 8.0    | 10.7                                                 | 0.84 | 14.6                                                  | 0.66 |
| FLT-3L*      | C22P1 | 3.2   | 8.5                        |                                   |        |                                                      |      |                                                       |      |
| FRACTALKINE* | C22P1 | 16.0  | 8.0                        |                                   |        |                                                      |      |                                                       |      |
| G-CSF        | C22P1 | 16.0  | 36.4                       | 8.0                               | 8.0    | 15.1                                                 | 0.79 | 13.0                                                  | 0.85 |
| GIP          | MH9   | 2.7   | 99.3                       | 23.2                              | 21.5   | 2.9                                                  | 1.00 | 11.1                                                  | 0.93 |
| GLP-1        | MH9   | 13.7  | 20.6                       | 6.9                               | 6.9    | 2.5                                                  | 0.98 | 7.5                                                   | 0.47 |
| GLUCAGON*    | MH9   | 13.7  | 19.9                       |                                   |        |                                                      |      |                                                       |      |
| GM-CSF       | C15P1 | 0.6   | 40.4                       | 0.3                               | 0.3    | 12.7                                                 | 0.97 | 22.1                                                  | 0.91 |
| GRO          | C22P1 | 16.0  | 100.0                      | 409.6                             | 423.5  | 2.9                                                  | 0.96 | 3.1                                                   | 0.95 |
| IFNA2*       | C22P1 | 3.2   | 17.3                       |                                   |        |                                                      |      |                                                       |      |
| IFNG         | C22P1 | 0.6   | 40.5                       | 0.3                               | 0.3    | 37.4                                                 | 0.76 | 40.9                                                  | 0.59 |
| IL-10        | C15P1 | 3.2   | 32.1                       | 1.6                               | 1.6    | 5.3                                                  | 0.98 | 12.3                                                  | 0.91 |
| IL-11        | C7P3  | 4.9   | 22.9                       | 2.4                               | 2.4    | 13.4                                                 | 0.88 | 17.5                                                  | 0.81 |
| IL-12P40     | C22P1 | 3.2   | 25.4                       | 1.6                               | 1.6    | 13.2                                                 | 0.89 | 6.8                                                   | 0.91 |
| IL-12P70*    | C15P1 | 0.6   | 18.1                       |                                   |        |                                                      |      |                                                       |      |
| IL-15        | C15P1 | 0.6   | 22.8                       | 0.3                               | 0.3    | 10.2                                                 | 0.96 | 12.8                                                  | 0.96 |
| IL-16        | C17P2 | 9.8   | 86.2                       | 24.5                              | 27.7   | 4.1                                                  | 0.97 | 8.0                                                   | 0.90 |
| IL-17        | C15P1 | 0.6   | 55.6                       | 0.8                               | 1.1    | 34.6                                                 | 0.91 | 52.1                                                  | 0.79 |
| IL-1A        | C22P1 | 3.2   | 20.6                       | 1.6                               | 1.6    | 14.1                                                 | 0.93 | 15.3                                                  | 0.91 |
| IL-1B        | C15P1 | 0.6   | 32.1                       | 0.3                               | 0.3    | 6.1                                                  | 0.98 | 7.3                                                   | 0.86 |
| IL-1RA       | C15P1 | 16.0  | 27.9                       | 8.0                               | 8.0    | 2.0                                                  | 0.99 | 4.6                                                   | 0.96 |
| IL-2         | C15P1 | 0.6   | 30.2                       | 0.3                               | 0.3    | 6.1                                                  | 0.96 | 19.2                                                  | 0.85 |
| IL-29 IFNL1* | C7P3  | 195.3 | 11.1                       |                                   |        |                                                      |      |                                                       |      |
| IL-3*        | C15P1 | 0.6   | 7.5                        |                                   |        |                                                      |      |                                                       |      |
| IL-33        | C17P2 | 4.9   | 21.4                       | 2.4                               | 2.4    | 11.6                                                 | 0.95 | 12.7                                                  | 0.95 |
| IL-4         | C15P1 | 3.2   | 25.1                       | 1.6                               | 1.6    | 6.5                                                  | 0.96 | 16.3                                                  | 0.85 |
| IL-5*        | C15P1 | 0.6   | 16.9                       |                                   |        |                                                      |      |                                                       |      |
| IL-6         | C15P1 | 0.6   | 33.4                       | 0.3                               | 0.3    | 5.5                                                  | 0.99 | 24.3                                                  | 0.88 |
| IL-7         | C15P1 | 3.2   | 21.6                       | 1.6                               | 1.6    | 12.0                                                 | 0.95 | 16.2                                                  | 0.91 |
| IL-8         | C22P1 | 0.6   | 97.7                       | 5.3                               | 5.0    | 11.7                                                 | 0.94 | 12.6                                                  | 0.93 |
| INSULIN      | MH9   | 137.2 | 95.2                       | 446.3                             | 478.1  | 1.4                                                  | 0.99 | 3.3                                                   | 0.95 |
| IP-10        | C22P1 | 16.0  | 100.0                      | 218.6                             | 221.8  | 6.5                                                  | 0.90 | 6.7                                                   | 0.89 |
| LEPTIN       | MH9   | 137.2 | 99.8                       | 7740.0                            | 8729.9 | 0.6                                                  | 1.00 | 1.7                                                   | 0.99 |
| LIF*         | C17P2 | 4.9   | 3.5                        |                                   |        |                                                      |      |                                                       |      |
| MCP-1        | C22P1 | 3.2   | 100.0                      | 278.0                             | 269.9  | 4.6                                                  | 0.85 | 5.0                                                   | 0.82 |
| MCP-2        | C17P2 | 19.5  | 95.0                       | 42.0                              | 39.1   | 4.2                                                  | 0.94 | 5.7                                                   | 0.90 |
| MCP-3*       | C22P1 | 16.0  | 13.5                       |                                   |        |                                                      |      |                                                       |      |
| MCP-4        | C17P2 | 9.8   | 95.0                       | 98.3                              | 96.6   | 1.8                                                  | 0.98 | 3.9                                                   | 0.90 |
| MDC          | C22P1 | 3.2   | 100.0                      | 771.7                             | 772.0  | 3.0                                                  | 0.97 | 3.0                                                   | 0.97 |
| MIP-1A       | C22P1 | 0.6   | 28.9                       | 0.3                               | 0.3    | 17.6                                                 | 0.95 | 18.5                                                  | 0.95 |
| MIP-1B       | C22P1 | 3.2   | 90.4                       | 24.3                              | 24.8   | 5.2                                                  | 0.91 | 7.1                                                   | 0.83 |
| MIP-1D       | C17P2 | 12.2  | 100.0                      | 1576.7                            | 1513.5 | 1.7                                                  | 0.98 | 2.5                                                   | 0.95 |
| PP           | MH9   | 13.7  | 95.2                       | 102.5                             | 102.0  | 2.2                                                  | 1.00 | 5.6                                                   | 0.97 |

|          |        |       |       |          |          |      |      |      |      |
|----------|--------|-------|-------|----------|----------|------|------|------|------|
| PYY      | MH9    | 123.5 | 21.6  | 61.7     | 61.7     | 1.9  | 0.95 | 4.0  | 0.76 |
| SCD30*   | SR13P1 | 122.1 | 2.2   |          |          |      |      |      |      |
| SCD40L   | C22P1  | 3.2   | 99.7  | 10000.0  | 10000.0  | 1.3  | 0.71 | 1.5  | 0.61 |
| SCF      | C17P2  | 2.4   | 35.7  | 1.2      | 1.2      | 16.6 | 0.83 | 26.9 | 0.54 |
| SDF-1A+B | C17P2  | 97.7  | 100.0 | 3317.5   | 3304.6   | 0.8  | 0.96 | 1.1  | 0.91 |
| SEGFR    | SR13P1 | 610.4 | 100.0 | 48548.5  | 49663.5  | 2.6  | 0.71 | 3.3  | 0.51 |
| SGP130   | SR13P1 | 122.1 | 100.0 | 158231.0 | 160246.0 | 2.1  | 0.78 | 2.7  | 0.63 |
| SIL-1RI* | SR13P1 | 122.1 | 0.3   |          |          |      |      |      |      |
| SIL-2RA* | C22P1  | 3.2   | 3.3   |          |          |      |      |      |      |
| SIL-4R   | SR13P1 | 244.2 | 100.0 | 1035.6   | 1036.8   | 1.6  | 0.95 | 2.5  | 0.86 |
| SIL-6R   | SR13P1 | 61.1  | 100.0 | 15165.6  | 15804.0  | 2.6  | 0.82 | 3.4  | 0.70 |
| SILRII   | SR13P1 | 610.4 | 99.7  | 5040.1   | 5054.3   | 1.7  | 0.95 | 2.7  | 0.87 |
| SRAGE*   | SR13P1 | 61.1  | 4.5   |          |          |      |      |      |      |
| STNFR1   | SR13P1 | 61.1  | 99.8  | 1060.2   | 1102.0   | 2.2  | 0.88 | 3.4  | 0.71 |
| STNFR2   | SR13P1 | 61.1  | 100.0 | 4864.7   | 5427.0   | 3.2  | 0.81 | 4.4  | 0.64 |
| SVEGFR1* | SR13P1 | 610.4 | 2.3   |          |          |      |      |      |      |
| SVEGFR2  | SR13P1 | 610.4 | 100.0 | 11273.9  | 12187.8  | 3.1  | 0.77 | 4.4  | 0.53 |
| SVEGFR3  | SR13P1 | 610.4 | 83.6  | 1223.9   | 1256.0   | 3.0  | 0.91 | 4.5  | 0.81 |
| TARC     | C17P2  | 0.2   | 100.0 | 82.0     | 85.0     | 3.6  | 0.96 | 4.7  | 0.94 |
| TGF-A    | C15P1  | 0.6   | 81.9  | 1.8      | 1.7      | 9.7  | 0.98 | 19.9 | 0.92 |
| TNFA     | C22P1  | 0.6   | 99.2  | 5.0      | 5.7      | 10.1 | 0.88 | 14.6 | 0.74 |
| TNF-B    | C15P1  | 0.6   | 30.9  | 0.3      | 0.3      | 5.6  | 0.99 | 11.6 | 0.95 |
| TPO      | C17P2  | 12.2  | 53.5  | 24.0     | 20.4     | 7.4  | 0.93 | 10.8 | 0.86 |
| TRAIL    | C17P2  | 2.4   | 99.5  | 31.2     | 35.6     | 5.6  | 0.93 | 7.7  | 0.87 |
| TSLP*    | C17P2  | 2.4   | 16.1  |          |          |      |      |      |      |
| VEGF     | C22P1  | 16.0  | 52.2  | 43.2     | 45.3     | 5.2  | 0.88 | 6.0  | 0.79 |

Abbreviations: LLOD, lower limit of detection; CV, coefficient of variation; ICC, intra-class correlation coefficient

\*Analytes detectable in <20% of samples were excluded from further analysis

†Units in pg/ml. For calculation of median, measurements below analyte LLOD assigned a value of LLOD / 2.

‡CVs and ICCs based on log-concentrations.

**Supplemental Table 2: Associations with NHL for immune and inflammation markers included in the statistical analysis (N=67)**

| Analyte     | Analyte Category* | N <sub>Controls</sub> / N <sub>Cases</sub> | OR <sup>†</sup> | 95% CI    | P <sub>trend</sub> <sup>‡</sup> |
|-------------|-------------------|--------------------------------------------|-----------------|-----------|---------------------------------|
| BCA-1       | 1                 | 76 / 52                                    |                 |           | 1.0 x 10 <sup>-6</sup>          |
|             | 2                 | 75 / 52                                    | 1.0             | 0.6 - 1.6 |                                 |
|             | 3                 | 75 / 61                                    | 1.3             | 0.8 - 2.1 |                                 |
|             | 4                 | 75 / 136                                   | 2.7             | 1.7 - 4.2 |                                 |
| STNFR2      | 1                 | 76 / 45                                    |                 |           | 1.1 x 10 <sup>-6</sup>          |
|             | 2                 | 75 / 52                                    | 1.3             | 0.8 - 2.3 |                                 |
|             | 3                 | 75 / 82                                    | 2.1             | 1.2 - 3.5 |                                 |
|             | 4                 | 75 / 122                                   | 3.4             | 2 - 5.8   |                                 |
| TNFA        | 1                 | 76 / 68                                    |                 |           | 0.0004                          |
|             | 2                 | 75 / 41                                    | 0.6             | 0.4 - 1.1 |                                 |
|             | 3                 | 75 / 74                                    | 1.2             | 0.7 - 1.9 |                                 |
|             | 4                 | 75 / 118                                   | 1.8             | 1.1 - 2.9 |                                 |
| SVEGFR2     | 1                 | 77 / 54                                    |                 |           | 0.0005                          |
|             | 2                 | 74 / 57                                    | 1.2             | 0.7 - 1.9 |                                 |
|             | 3                 | 75 / 87                                    | 1.9             | 1.1 - 3.1 |                                 |
|             | 4                 | 75 / 103                                   | 2.3             | 1.4 - 3.9 |                                 |
| IL-16       | 1                 | 76 / 51                                    |                 |           | 0.006                           |
|             | 2                 | 76 / 77                                    | 1.5             | 0.9 - 2.5 |                                 |
|             | 3                 | 74 / 74                                    | 1.6             | 1 - 2.7   |                                 |
|             | 4                 | 75 / 99                                    | 2.1             | 1.3 - 3.3 |                                 |
| TRAIL       | 1                 | 76 / 68                                    |                 |           | 0.009                           |
|             | 2                 | 75 / 48                                    | 0.7             | 0.4 - 1.2 |                                 |
|             | 3                 | 75 / 80                                    | 1.2             | 0.8 - 1.9 |                                 |
|             | 4                 | 75 / 105                                   | 1.6             | 1 - 2.5   |                                 |
| AMYLIN      | 1                 | 171 / 148                                  |                 |           | 0.04                            |
|             | 2                 | 130 / 153                                  | 1.5             | 1 - 2.1   |                                 |
| CCL19-MIP3B | 1                 | 76 / 64                                    |                 |           | 0.06                            |
|             | 2                 | 75 / 66                                    | 1.1             | 0.7 - 1.8 |                                 |
|             | 3                 | 75 / 79                                    | 1.3             | 0.8 - 2.1 |                                 |
|             | 4                 | 75 / 92                                    | 1.6             | 1 - 2.5   |                                 |
| 6CKINE      | 1                 | 77 / 63                                    |                 |           | 0.07                            |
|             | 2                 | 74 / 68                                    | 1.1             | 0.7 - 1.8 |                                 |
|             | 3                 | 75 / 79                                    | 1.3             | 0.8 - 2   |                                 |
|             | 4                 | 75 / 91                                    | 1.5             | 0.9 - 2.3 |                                 |
| CXCL6-GCP2  | 1                 | 76 / 65                                    |                 |           | 0.09                            |
|             | 2                 | 75 / 72                                    | 1.2             | 0.7 - 1.9 |                                 |
|             | 3                 | 75 / 70                                    | 1.1             | 0.7 - 1.8 |                                 |
|             | 4                 | 75 / 94                                    | 1.5             | 0.9 - 2.4 |                                 |
| IL-33       | 1                 | 245 / 228                                  |                 |           | 0.10                            |
|             | 2                 | 56 / 73                                    | 1.4             | 0.9 - 2   |                                 |
| SCF         | 1                 | 203 / 184                                  |                 |           | 0.10                            |
|             | 2                 | 98 / 117                                   | 1.3             | 0.9 - 1.9 |                                 |

|           |   |           |     |           |      |
|-----------|---|-----------|-----|-----------|------|
| TPO       | 1 | 138 / 142 |     |           | 0.13 |
|           | 2 | 82 / 57   | 0.7 | 0.4 - 1   |      |
|           | 3 | 81 / 102  | 1.3 | 0.8 - 1.9 |      |
| STNFR1    | 1 | 76 / 56   |     |           | 0.15 |
|           | 2 | 75 / 78   | 1.5 | 0.9 - 2.4 |      |
|           | 3 | 75 / 89   | 1.8 | 1.1 - 2.9 |      |
|           | 4 | 75 / 78   | 1.5 | 0.9 - 2.6 |      |
| CXCL9-MIG | 1 | 76 / 64   |     |           | 0.15 |
|           | 2 | 75 / 65   | 1.1 | 0.7 - 1.7 |      |
|           | 3 | 75 / 88   | 1.5 | 0.9 - 2.4 |      |
|           | 4 | 75 / 84   | 1.4 | 0.9 - 2.3 |      |
| SEGFR     | 1 | 76 / 67   |     |           | 0.18 |
|           | 2 | 75 / 67   | 1.1 | 0.7 - 1.8 |      |
|           | 3 | 75 / 86   | 1.4 | 0.8 - 2.4 |      |
|           | 4 | 75 / 81   | 1.4 | 0.8 - 2.4 |      |
| VEGF      | 1 | 145 / 141 |     |           | 0.19 |
|           | 2 | 78 / 63   | 0.8 | 0.5 - 1.2 |      |
|           | 3 | 78 / 97   | 1.3 | 0.9 - 1.9 |      |
| SIL-6R    | 1 | 76 / 80   |     |           | 0.22 |
|           | 2 | 75 / 60   | 0.8 | 0.5 - 1.3 |      |
|           | 3 | 75 / 64   | 0.8 | 0.5 - 1.4 |      |
|           | 4 | 75 / 97   | 1.3 | 0.8 - 2   |      |
| IL-17     | 1 | 137 / 130 |     |           | 0.24 |
|           | 2 | 82 / 76   | 1.0 | 0.6 - 1.5 |      |
|           | 3 | 82 / 95   | 1.2 | 0.8 - 1.9 |      |
| SVEGFR3   | 1 | 77 / 69   |     |           | 0.27 |
|           | 2 | 74 / 77   | 1.2 | 0.7 - 1.9 |      |
|           | 3 | 76 / 68   | 1.0 | 0.6 - 1.6 |      |
|           | 4 | 74 / 87   | 1.3 | 0.8 - 2.2 |      |
| IL-4      | 1 | 231 / 220 |     |           | 0.28 |
|           | 2 | 70 / 81   | 1.2 | 0.8 - 1.8 |      |
| C-PEPTIDE | 1 | 76 / 64   |     |           | 0.30 |
|           | 2 | 75 / 77   | 1.2 | 0.8 - 1.9 |      |
|           | 3 | 75 / 78   | 1.3 | 0.8 - 2   |      |
|           | 4 | 75 / 82   | 1.4 | 0.8 - 2.2 |      |
| IP-10     | 1 | 76 / 74   |     |           | 0.30 |
|           | 2 | 75 / 72   | 1.0 | 0.6 - 1.6 |      |
|           | 3 | 75 / 66   | 0.9 | 0.6 - 1.5 |      |
|           | 4 | 75 / 89   | 1.3 | 0.8 - 2   |      |
| SGP130    | 1 | 76 / 80   |     |           | 0.30 |
|           | 2 | 75 / 60   | 0.8 | 0.5 - 1.2 |      |
|           | 3 | 75 / 66   | 0.8 | 0.5 - 1.3 |      |
|           | 4 | 75 / 95   | 1.3 | 0.8 - 2   |      |
| EOTAXIN-2 | 1 | 76 / 72   |     |           | 0.34 |
|           | 2 | 75 / 66   | 0.9 | 0.6 - 1.5 |      |
|           | 3 | 75 / 79   | 1.1 | 0.7 - 1.7 |      |
|           | 4 | 75 / 84   | 1.2 | 0.8 - 1.9 |      |

|         |   |           |     |           |      |
|---------|---|-----------|-----|-----------|------|
| TARC    | 1 | 77 / 72   |     |           | 0.37 |
|         | 2 | 74 / 71   | 1.0 | 0.7 - 1.6 |      |
|         | 3 | 75 / 74   | 1.1 | 0.7 - 1.6 |      |
|         | 4 | 75 / 84   | 1.2 | 0.8 - 2   |      |
| PP      | 1 | 76 / 74   |     |           | 0.39 |
|         | 2 | 75 / 77   | 1.1 | 0.7 - 1.7 |      |
|         | 3 | 75 / 63   | 0.9 | 0.6 - 1.4 |      |
|         | 4 | 75 / 87   | 1.2 | 0.8 - 2   |      |
| SCD40L  | 1 | 128 / 120 |     |           | 0.40 |
|         | 2 | 173 / 181 | 1.2 | 0.8 - 1.8 |      |
| IL-11   | 1 | 236 / 228 |     |           | 0.45 |
|         | 2 | 65 / 73   | 1.2 | 0.8 - 1.7 |      |
| IL-15   | 1 | 229 / 236 |     |           | 0.47 |
|         | 2 | 72 / 65   | 0.9 | 0.6 - 1.3 |      |
| MCP-2   | 1 | 76 / 93   |     |           | 0.48 |
|         | 2 | 75 / 79   | 0.8 | 0.5 - 1.3 |      |
|         | 3 | 75 / 46   | 0.5 | 0.3 - 0.8 |      |
|         | 4 | 75 / 83   | 0.8 | 0.5 - 1.3 |      |
| CTACK   | 1 | 76 / 68   |     |           | 0.50 |
|         | 2 | 75 / 70   | 1.1 | 0.7 - 1.7 |      |
|         | 3 | 75 / 91   | 1.4 | 0.9 - 2.3 |      |
|         | 4 | 75 / 72   | 1.1 | 0.7 - 1.9 |      |
| IL-10   | 1 | 208 / 201 |     |           | 0.53 |
|         | 2 | 93 / 100  | 1.1 | 0.8 - 1.6 |      |
| MIP-1B  | 1 | 76 / 81   |     |           | 0.54 |
|         | 2 | 75 / 68   | 0.9 | 0.6 - 1.3 |      |
|         | 3 | 75 / 60   | 0.8 | 0.5 - 1.2 |      |
|         | 4 | 75 / 92   | 1.2 | 0.7 - 1.9 |      |
| MIP-1A  | 1 | 211 / 217 |     |           | 0.58 |
|         | 2 | 90 / 84   | 0.9 | 0.6 - 1.3 |      |
| MCP-1   | 1 | 76 / 85   |     |           | 0.61 |
|         | 2 | 75 / 75   | 0.9 | 0.6 - 1.4 |      |
|         | 3 | 75 / 63   | 0.7 | 0.4 - 1.2 |      |
|         | 4 | 75 / 78   | 0.9 | 0.6 - 1.5 |      |
| FGF-2   | 1 | 226 / 221 |     |           | 0.62 |
|         | 4 | 75 / 80   | 1.1 | 0.7 - 1.6 |      |
| TGF-A   | 1 | 76 / 89   |     |           | 0.64 |
|         | 2 | 75 / 63   | 0.7 | 0.5 - 1.1 |      |
|         | 3 | 75 / 76   | 0.8 | 0.5 - 1.4 |      |
|         | 4 | 75 / 73   | 0.8 | 0.5 - 1.3 |      |
| GRO     | 1 | 76 / 88   |     |           | 0.65 |
|         | 2 | 75 / 56   | 0.7 | 0.4 - 1.1 |      |
|         | 3 | 75 / 88   | 1.0 | 0.7 - 1.6 |      |
|         | 4 | 75 / 69   | 0.8 | 0.5 - 1.3 |      |
| INSULIN | 1 | 76 / 68   |     |           | 0.66 |
|         | 2 | 75 / 75   | 1.1 | 0.7 - 1.8 |      |
|         | 3 | 75 / 81   | 1.2 | 0.8 - 1.9 |      |
|         | 4 | 75 / 77   | 1.2 | 0.7 - 1.9 |      |

|              |   |           |     |           |      |
|--------------|---|-----------|-----|-----------|------|
| LEPTIN       | 1 | 76 / 75   |     |           | 0.67 |
|              | 2 | 75 / 66   | 0.9 | 0.6 - 1.4 |      |
|              | 3 | 75 / 95   | 1.3 | 0.8 - 2   |      |
|              | 4 | 75 / 65   | 0.8 | 0.5 - 1.4 |      |
| GLP-1        | 1 | 241 / 237 |     |           | 0.68 |
|              | 2 | 60 / 64   | 1.1 | 0.7 - 1.6 |      |
| IL-7         | 1 | 238 / 234 |     |           | 0.69 |
|              | 2 | 63 / 67   | 1.1 | 0.7 - 1.6 |      |
| EGF          | 1 | 76 / 93   |     |           | 0.70 |
|              | 2 | 75 / 52   | 0.5 | 0.3 - 0.9 |      |
|              | 3 | 76 / 82   | 0.9 | 0.5 - 1.4 |      |
|              | 4 | 74 / 74   | 0.8 | 0.5 - 1.4 |      |
| GIP          | 1 | 76 / 72   |     |           | 0.71 |
|              | 2 | 75 / 91   | 1.3 | 0.8 - 1.9 |      |
|              | 3 | 75 / 65   | 0.9 | 0.6 - 1.5 |      |
|              | 4 | 75 / 73   | 1.0 | 0.6 - 1.6 |      |
| IFNG         | 1 | 181 / 177 |     |           | 0.72 |
|              | 2 | 120 / 124 | 1.1 | 0.7 - 1.5 |      |
| MCP-4        | 1 | 76 / 78   |     |           | 0.73 |
|              | 2 | 75 / 75   | 1.0 | 0.6 - 1.5 |      |
|              | 3 | 75 / 77   | 1.0 | 0.6 - 1.5 |      |
|              | 4 | 75 / 71   | 0.9 | 0.6 - 1.5 |      |
| IL-8         | 1 | 76 / 74   |     |           | 0.74 |
|              | 2 | 75 / 84   | 1.2 | 0.7 - 1.8 |      |
|              | 3 | 75 / 71   | 1.0 | 0.6 - 1.5 |      |
|              | 4 | 75 / 72   | 1.0 | 0.6 - 1.6 |      |
| IL-12P40     | 1 | 223 / 226 |     |           | 0.78 |
|              | 3 | 78 / 75   | 0.9 | 0.7 - 1.4 |      |
| CXCL11-I-TAC | 1 | 76 / 81   |     |           | 0.78 |
|              | 2 | 75 / 67   | 0.9 | 0.5 - 1.4 |      |
|              | 3 | 75 / 68   | 0.9 | 0.6 - 1.4 |      |
|              | 4 | 75 / 84   | 1.1 | 0.7 - 1.7 |      |
| IL-6         | 1 | 199 / 202 |     |           | 0.79 |
|              | 3 | 27 / 29   | 1.0 | 0.7 - 1.4 |      |
| G-CSF        | 1 | 193 / 190 |     |           | 0.79 |
|              | 2 | 108 / 111 | 1.0 | 0.7 - 1.5 |      |
| IL-1B        | 1 | 206 / 203 |     |           | 0.79 |
|              | 2 | 95 / 98   | 1.0 | 0.7 - 1.5 |      |
| PYY          | 1 | 235 / 237 |     |           | 0.84 |
|              | 2 | 66 / 64   | 1.0 | 0.6 - 1.4 |      |
| IL-1A        | 1 | 238 / 240 |     |           | 0.84 |
|              | 2 | 63 / 61   | 1.0 | 0.6 - 1.4 |      |
| IL-1RA       | 1 | 216 / 218 |     |           | 0.85 |
|              | 2 | 85 / 83   | 1.0 | 0.7 - 1.4 |      |

|             |   |           |     |           |      |
|-------------|---|-----------|-----|-----------|------|
| IL-2        | 1 | 211 / 209 |     |           | 0.85 |
|             | 2 | 90 / 92   | 1.0 | 0.7 - 1.5 |      |
| TNF-B       | 1 | 209 / 207 |     |           | 0.86 |
|             | 2 | 92 / 94   | 1.0 | 0.7 - 1.5 |      |
| SDF-1A-B    | 1 | 76 / 78   |     |           | 0.87 |
|             | 2 | 75 / 77   | 1.0 | 0.7 - 1.5 |      |
|             | 3 | 75 / 70   | 0.9 | 0.6 - 1.4 |      |
|             | 4 | 75 / 76   | 1.0 | 0.6 - 1.6 |      |
| CCL20-MIP3A | 1 | 114 / 112 |     |           | 0.90 |
|             | 2 | 94 / 95   | 1.0 | 0.7 - 1.6 |      |
|             | 3 | 93 / 94   | 1.0 | 0.7 - 1.6 |      |
| ENA-78      | 1 | 76 / 77   |     |           | 0.91 |
|             | 2 | 75 / 77   | 1.0 | 0.6 - 1.6 |      |
|             | 3 | 75 / 72   | 0.9 | 0.6 - 1.5 |      |
|             | 4 | 75 / 75   | 1.0 | 0.6 - 1.6 |      |
| GM-CSF      | 1 | 180 / 179 |     |           | 0.93 |
|             | 2 | 121 / 122 | 1.0 | 0.7 - 1.4 |      |
| MIP-1D      | 1 | 76 / 71   |     |           | 0.93 |
|             | 2 | 75 / 95   | 1.3 | 0.9 - 2.1 |      |
|             | 3 | 75 / 57   | 0.8 | 0.5 - 1.3 |      |
|             | 4 | 75 / 78   | 1.1 | 0.7 - 1.7 |      |
| SIL-4R      | 1 | 76 / 75   |     |           | 0.94 |
|             | 2 | 75 / 75   | 1.0 | 0.6 - 1.6 |      |
|             | 3 | 75 / 76   | 1.0 | 0.6 - 1.7 |      |
|             | 4 | 75 / 75   | 1.0 | 0.6 - 1.7 |      |
| SILRII      | 1 | 76 / 88   |     |           | 0.95 |
|             | 2 | 75 / 62   | 0.7 | 0.5 - 1.1 |      |
|             | 3 | 75 / 67   | 0.8 | 0.5 - 1.2 |      |
|             | 4 | 75 / 84   | 1.0 | 0.6 - 1.5 |      |
| MDC         | 1 | 76 / 76   |     |           | 0.96 |
|             | 2 | 75 / 74   | 1.0 | 0.6 - 1.6 |      |
|             | 3 | 75 / 78   | 1.0 | 0.7 - 1.7 |      |
|             | 4 | 75 / 73   | 1.0 | 0.6 - 1.6 |      |
| EOTAXIN     | 1 | 76 / 71   |     |           | 0.99 |
|             | 2 | 75 / 78   | 1.1 | 0.7 - 1.8 |      |
|             | 3 | 75 / 82   | 1.2 | 0.7 - 1.9 |      |
|             | 4 | 75 / 70   | 1.0 | 0.6 - 1.7 |      |

Abbreviations: N<sub>Cont.</sub>, number of controls; N<sub>Case</sub>, number of cases; OR, odds ratio; CI, confidence interval; LLOD, lower limit of detection.

\* Markers with <25% of measurements below the LLOD (n=32) were categorized into quartiles based on the distribution among controls; markers with 25-50% of measurements below the LLOD (n=3) were categorized into three groups (<LLOD, < median detectable level among controls, ≥ median); and markers with between 50% and 80% of measurements below the LLOD (n=16) were categorized into two groups (<LLOD, detectable level).

† Odds ratios computed using conditional logistic regression.

\* P-values for analytes detectable in <50% of samples computed using Wald statistic of regression model parameters for dichotomized analyte level (<lower limit of detection vs. detectable). P-values for all other analytes computed using Wald statistic of regression model parameters for analyte intra-category medians modeled as a continuous variable.

**Supplemental Table 3: Associations with common NHL subtypes for dichotomized immune and inflammation markers included in statistical analysis (N=67)**

| Analyte       | Analyte Category* | N <sub>Controls</sub> | CLL/SLL |     |         |        | DLBCL |     |         |        | FL |     |          |        | P <sub>Homogeneity</sub> |
|---------------|-------------------|-----------------------|---------|-----|---------|--------|-------|-----|---------|--------|----|-----|----------|--------|--------------------------|
|               |                   |                       | N       | OR  | 95% CI  | P      | N     | OR  | 95% CI  | P      | N  | OR  | 95% CI   | P      |                          |
| BCA-1         | 1                 | 151                   | 45      |     |         |        | 16    |     |         |        | 12 |     |          |        |                          |
|               | 2                 | 150                   | 61      | 1.4 | 0.9-2.2 | 0.15   | 55    | 3.3 | 1.8-6.2 | 0.0001 | 29 | 2.8 | 1.3-5.7  | 0.007  | 0.03                     |
| STNFR2        | 1                 | 151                   | 31      |     |         |        | 18    |     |         |        | 14 |     |          |        |                          |
|               | 2                 | 150                   | 75      | 2.6 | 1.6-4.3 | 0.0001 | 53    | 2.8 | 1.5-5.2 | 0.0009 | 27 | 2.2 | 1.1-4.5  | 0.03   | 0.86                     |
| TNF- $\alpha$ | 1                 | 151                   | 46      |     |         |        | 23    |     |         |        | 6  |     |          |        |                          |
|               | 2                 | 150                   | 60      | 1.3 | 0.8-2.1 | 0.22   | 48    | 2.1 | 1.2-3.7 | 0.009  | 35 | 6.0 | 2.4-15.0 | 0.0001 | 0.008                    |
| SVEGFR2       | 1                 | 151                   | 38      |     |         |        | 25    |     |         |        | 17 |     |          |        |                          |
|               | 2                 | 150                   | 68      | 1.8 | 1.1-2.9 | 0.01   | 46    | 2.1 | 1.2-3.7 | 0.01   | 24 | 1.4 | 0.7-2.8  | 0.30   | 0.67                     |
| IL-16         | 1                 | 152                   | 49      |     |         |        | 25    |     |         |        | 15 |     |          |        |                          |
|               | 2                 | 149                   | 57      | 1.2 | 0.8-1.9 | 0.49   | 46    | 1.9 | 1.1-3.3 | 0.03   | 26 | 1.9 | 0.9-3.8  | 0.08   | 0.26                     |
| TRAIL         | 1                 | 151                   | 33      |     |         |        | 28    |     |         |        | 15 |     |          |        |                          |
|               | 2                 | 150                   | 73      | 2.5 | 1.5-4.1 | 0.0003 | 43    | 1.5 | 0.9-2.6 | 0.17   | 26 | 1.8 | 0.9-3.7  | 0.10   | 0.29                     |
| AMYLIN        | 1                 | 171                   | 48      |     |         |        | 34    |     |         |        | 19 |     |          |        |                          |
|               | 2                 | 130                   | 58      | 1.7 | 1.1-2.8 | 0.03   | 37    | 1.6 | 0.9-2.8 | 0.09   | 22 | 1.5 | 0.7-3.0  | 0.28   | 0.92                     |
| CCL19-MIP3B   | 1                 | 151                   | 56      |     |         |        | 24    |     |         |        | 15 |     |          |        |                          |
|               | 2                 | 150                   | 50      | 0.9 | 0.5-1.3 | 0.47   | 47    | 2.1 | 1.2-3.7 | 0.009  | 26 | 1.9 | 0.9-3.8  | 0.07   | 0.01                     |
| 6CKINE        | 1                 | 151                   | 48      |     |         |        | 35    |     |         |        | 15 |     |          |        |                          |
|               | 2                 | 150                   | 58      | 1.3 | 0.8-2.1 | 0.24   | 36    | 0.9 | 0.5-1.6 | 0.77   | 26 | 1.8 | 0.9-3.6  | 0.11   | 0.28                     |
| CXCL6-GCP2    | 1                 | 151                   | 52      |     |         |        | 30    |     |         |        | 19 |     |          |        |                          |
|               | 2                 | 150                   | 54      | 1.1 | 0.7-1.7 | 0.75   | 41    | 1.4 | 0.8-2.4 | 0.21   | 22 | 1.1 | 0.6-2.2  | 0.78   | 0.68                     |
| IL-33         | 1                 | 245                   | 78      |     |         |        | 50    |     |         |        | 30 |     |          |        |                          |
|               | 2                 | 56                    | 28      | 1.6 | 0.9-2.7 | 0.10   | 21    | 1.9 | 1-3.5   | 0.04   | 11 | 1.5 | 0.7-3.3  | 0.29   | 0.84                     |
| SCF           | 1                 | 203                   | 55      |     |         |        | 45    |     |         |        | 26 |     |          |        |                          |
|               | 2                 | 98                    | 51      | 2.0 | 1.3-3.2 | 0.003  | 26    | 1.1 | 0.6-1.9 | 0.75   | 15 | 1.4 | 0.7-2.9  | 0.37   | 0.17                     |
| TPO           | 1                 | 151                   | 59      |     |         |        | 32    |     |         |        | 19 |     |          |        |                          |
|               | 2                 | 150                   | 47      | 0.7 | 0.5-1.2 | 0.20   | 39    | 1.5 | 0.9-2.5 | 0.18   | 22 | 1.0 | 0.5-2.1  | 0.90   | 0.11                     |



|           |   |     |    |     |         |      |    |     |         |       |    |     |         |      |      |
|-----------|---|-----|----|-----|---------|------|----|-----|---------|-------|----|-----|---------|------|------|
| STNFR1    | 1 | 151 | 49 |     |         |      | 30 |     |         |       | 15 |     |         |      |      |
|           | 2 | 150 | 57 | 1.2 | 0.8-1.9 | 0.42 | 41 | 1.3 | 0.8-2.3 | 0.29  | 26 | 1.8 | 0.9-3.7 | 0.10 | 0.59 |
| CXCL9-MIG | 1 | 151 | 49 |     |         |      | 20 |     |         |       | 17 |     |         |      |      |
|           | 2 | 150 | 57 | 1.2 | 0.8-1.9 | 0.41 | 51 | 2.4 | 1.3-4.2 | 0.004 | 24 | 1.6 | 0.8-3.3 | 0.16 | 0.16 |
| SEGFR     | 1 | 151 | 45 |     |         |      | 31 |     |         |       | 16 |     |         |      |      |
|           | 2 | 150 | 61 | 1.3 | 0.8-2.1 | 0.22 | 40 | 1.5 | 0.9-2.6 | 0.15  | 25 | 1.6 | 0.8-3.2 | 0.20 | 0.89 |
| VEGF      | 1 | 151 | 60 |     |         |      | 36 |     |         |       | 20 |     |         |      |      |
|           | 2 | 150 | 46 | 0.8 | 0.5-1.3 | 0.37 | 35 | 0.9 | 0.6-1.6 | 0.83  | 21 | 1.1 | 0.6-2.1 | 0.82 | 0.73 |
| SIL-6R    | 1 | 151 | 49 |     |         |      | 27 |     |         |       | 18 |     |         |      |      |
|           | 2 | 150 | 57 | 1.2 | 0.8-1.9 | 0.48 | 44 | 1.7 | 1-2.8   | 0.07  | 23 | 1.4 | 0.7-2.7 | 0.39 | 0.58 |
| IL-17     | 1 | 151 | 52 |     |         |      | 27 |     |         |       | 18 |     |         |      |      |
|           | 2 | 150 | 54 | 1.1 | 0.7-1.7 | 0.79 | 44 | 1.7 | 1-3     | 0.05  | 23 | 1.2 | 0.6-2.4 | 0.61 | 0.31 |
| SVEGFR3   | 1 | 151 | 58 |     |         |      | 32 |     |         |       | 18 |     |         |      |      |
|           | 2 | 150 | 48 | 0.9 | 0.6-1.4 | 0.60 | 39 | 1.2 | 0.7-2.1 | 0.46  | 23 | 1.2 | 0.6-2.4 | 0.53 | 0.51 |
| IL-4      | 1 | 231 | 81 |     |         |      | 51 |     |         |       | 29 |     |         |      |      |
|           | 2 | 70  | 25 | 1.0 | 0.6-1.7 | 0.97 | 20 | 1.3 | 0.7-2.4 | 0.40  | 12 | 1.3 | 0.6-2.7 | 0.54 | 0.75 |
| C-PEPTIDE | 1 | 151 | 49 |     |         |      | 30 |     |         |       | 20 |     |         |      |      |
|           | 2 | 150 | 57 | 1.2 | 0.7-1.9 | 0.48 | 41 | 1.6 | 0.9-2.7 | 0.11  | 21 | 1.0 | 0.5-1.9 | 0.89 | 0.46 |
| IP-10     | 1 | 151 | 51 |     |         |      | 31 |     |         |       | 18 |     |         |      |      |
|           | 2 | 150 | 55 | 1.1 | 0.7-1.7 | 0.75 | 40 | 1.3 | 0.7-2.2 | 0.43  | 23 | 1.4 | 0.7-2.7 | 0.38 | 0.80 |
| SGP130    | 1 | 151 | 44 |     |         |      | 29 |     |         |       | 20 |     |         |      |      |
|           | 2 | 150 | 62 | 1.4 | 0.9-2.3 | 0.13 | 42 | 1.4 | 0.8-2.4 | 0.25  | 21 | 1.1 | 0.6-2.2 | 0.73 | 0.82 |
| EOTAXIN-2 | 1 | 151 | 42 |     |         |      | 41 |     |         |       | 19 |     |         |      |      |
|           | 2 | 150 | 64 | 1.5 | 1-2.4   | 0.08 | 30 | 0.8 | 0.5-1.3 | 0.37  | 22 | 1.2 | 0.6-2.3 | 0.64 | 0.13 |
| TARC      | 1 | 151 | 65 |     |         |      | 30 |     |         |       | 16 |     |         |      |      |
|           | 2 | 150 | 41 | 0.6 | 0.4-1   | 0.06 | 41 | 1.3 | 0.8-2.3 | 0.32  | 25 | 1.7 | 0.8-3.3 | 0.16 | 0.02 |
| PP        | 1 | 151 | 51 |     |         |      | 33 |     |         |       | 23 |     |         |      |      |
|           | 2 | 150 | 55 | 1.2 | 0.7-1.9 | 0.51 | 38 | 1.1 | 0.6-1.9 | 0.71  | 18 | 0.8 | 0.4-1.5 | 0.46 | 0.56 |
| SCD40L    | 1 | 128 | 50 |     |         |      | 21 |     |         |       | 15 |     |         |      |      |
|           | 2 | 173 | 56 | 0.8 | 0.5-1.3 | 0.36 | 50 | 2.0 | 1.1-3.6 | 0.53  | 26 | 1.2 | 0.6-2.5 | 0.53 | 0.02 |

|         |   |     |    |     |         |      |    |     |         |      |    |     |         |      |      |
|---------|---|-----|----|-----|---------|------|----|-----|---------|------|----|-----|---------|------|------|
| IL-11   | 1 | 236 | 80 |     |         |      | 57 |     |         |      | 31 |     |         |      |      |
|         | 2 | 65  | 26 | 1.2 | 0.7-2   | 0.53 | 14 | 0.9 | 0.5-1.7 | 0.69 | 10 | 1.3 | 0.6-2.9 | 0.53 | 0.65 |
| IL-15   | 1 | 229 | 81 |     |         |      | 53 |     |         |      | 34 |     |         |      |      |
|         | 2 | 72  | 25 | 0.9 | 0.6-1.6 | 0.82 | 18 | 1.1 | 0.6-1.9 | 0.88 | 7  | 0.7 | 0.3-1.6 | 0.35 | 0.67 |
| MCP-2   | 1 | 151 | 61 |     |         |      | 43 |     |         |      | 20 |     |         |      |      |
|         | 2 | 150 | 45 | 0.7 | 0.5-1.2 | 0.20 | 28 | 0.6 | 0.4-1.1 | 0.09 | 21 | 1.0 | 0.5-1.9 | 0.95 | 0.55 |
| CTACK   | 1 | 151 | 54 |     |         |      | 29 |     |         |      | 21 |     |         |      |      |
|         | 2 | 150 | 52 | 1.0 | 0.7-1.6 | 0.95 | 42 | 1.4 | 0.8-2.4 | 0.24 | 20 | 0.9 | 0.5-1.8 | 0.84 | 0.53 |
| IL-10   | 1 | 208 | 68 |     |         |      | 44 |     |         |      | 31 |     |         |      |      |
|         | 2 | 93  | 38 | 1.2 | 0.8-2   | 0.42 | 27 | 1.4 | 0.8-2.4 | 0.25 | 10 | 0.7 | 0.3-1.5 | 0.38 | 0.31 |
| MIP-1B  | 1 | 151 | 64 |     |         |      | 35 |     |         |      | 18 |     |         |      |      |
|         | 2 | 150 | 12 | 0.7 | 0.4-1.0 | 0.07 | 36 | 1.1 | 0.6-1.9 | 0.74 | 23 | 1.2 | 0.6-2.4 | 0.56 | 0.14 |
| MIP-1A  | 1 | 211 | 78 |     |         |      | 45 |     |         |      | 34 |     |         |      |      |
|         | 2 | 90  | 28 | 0.8 | 0.5-1.3 | 0.10 | 26 | 1.4 | 0.8-2.4 | 0.27 | 7  | 0.5 | 0.2-1.2 | 0.13 | 0.10 |
| MCP-1   | 1 | 151 | 64 |     |         |      | 36 |     |         |      | 18 |     |         |      |      |
|         | 2 | 150 | 42 | 0.7 | 0.4-1.0 | 0.07 | 35 | 0.9 | 0.5-1.5 | 0.67 | 23 | 1.2 | 0.6-2.4 | 0.64 | 0.28 |
| FGF-2   | 1 | 226 | 74 |     |         |      | 53 |     |         |      | 32 |     |         |      |      |
|         | 2 | 75  | 32 | 1.3 | 0.8-2.1 | 0.31 | 18 | 1.0 | 0.5-1.8 | 0.96 | 9  | 0.9 | 0.4-1.9 | 0.70 | 0.56 |
| TGF-A   | 1 | 151 | 65 |     |         |      | 37 |     |         |      | 15 |     |         |      |      |
|         | 2 | 150 | 41 | 0.6 | 0.4-1   | 0.05 | 34 | 1.0 | 0.5-1.7 | 0.85 | 26 | 1.5 | 0.7-3   | 0.31 | 0.09 |
| GRO     | 1 | 151 | 52 |     |         |      | 37 |     |         |      | 17 |     |         |      |      |
|         | 2 | 150 | 54 | 1.0 | 0.6-1.6 | 0.92 | 34 | 1.0 | 0.6-1.7 | 0.90 | 24 | 1.3 | 0.7-2.7 | 0.44 | 0.75 |
| INSULIN | 1 | 151 | 47 |     |         |      | 32 |     |         |      | 21 |     |         |      |      |
|         | 2 | 150 | 59 | 1.3 | 0.8-2.1 | 0.30 | 39 | 1.4 | 0.8-2.4 | 0.24 | 20 | 0.9 | 0.4-1.8 | 0.70 | 0.51 |
| LEPTIN  | 1 | 151 | 41 |     |         |      | 33 |     |         |      | 19 |     |         |      |      |
|         | 2 | 150 | 65 | 1.7 | 1-2.8   | 0.06 | 38 | 1.4 | 0.8-2.5 | 0.25 | 22 | 1.0 | 0.5-2.2 | 0.99 | 0.52 |
| GLP-1   | 1 | 241 | 88 |     |         |      | 54 |     |         |      | 31 |     |         |      |      |
|         | 2 | 60  | 18 | 0.8 | 0.4-1.5 | 0.49 | 17 | 1.2 | 0.6-2.3 | 0.57 | 10 | 1.3 | 0.6-2.9 | 0.51 | 0.47 |
| IL-7    | 1 | 238 | 86 |     |         |      | 59 |     |         |      | 30 |     |         |      |      |
|         | 2 | 63  | 20 | 0.9 | 0.5-1.6 | 0.65 | 12 | 0.8 | 0.4-1.5 | 0.46 | 11 | 1.3 | 0.6-2.8 | 0.49 | 0.53 |

|              |   |     |    |     |         |      |    |     |         |      |    |     |         |      |      |
|--------------|---|-----|----|-----|---------|------|----|-----|---------|------|----|-----|---------|------|------|
| EGF          | 1 | 151 | 57 |     |         |      | 31 |     |         |      | 18 |     |         |      |      |
|              | 2 | 150 | 49 | 0.9 | 0.6-1.5 | 0.69 | 40 | 1.3 | 0.7-2.4 | 0.34 | 23 | 1.2 | 0.6-2.5 | 0.58 | 0.50 |
| GIP          | 1 | 151 | 54 |     |         |      | 41 |     |         |      | 19 |     |         |      |      |
|              | 2 | 150 | 52 | 0.9 | 0.6-1.5 | 0.72 | 30 | 0.9 | 0.5-1.5 | 0.58 | 22 | 1.0 | 0.5-2.2 | 0.91 | 0.90 |
| IFNG         | 1 | 181 | 64 |     |         |      | 45 |     |         |      | 19 |     |         |      |      |
|              | 2 | 120 | 42 | 1.0 | 0.6-1.5 | 0.92 | 26 | 0.9 | 0.5-1.5 | 0.62 | 22 | 1.7 | 0.9-3.4 | 0.11 | 0.22 |
| MCP-4        | 1 | 151 | 60 |     |         |      | 43 |     |         |      | 18 |     |         |      |      |
|              | 2 | 150 | 46 | 0.8 | 0.5-1.2 | 0.30 | 28 | 0.6 | 0.3-1   | 0.06 | 23 | 1.3 | 0.7-2.6 | 0.43 | 0.16 |
| IL-8         | 1 | 151 | 62 |     |         |      | 35 |     |         |      | 21 |     |         |      |      |
|              | 2 | 150 | 44 | 0.7 | 0.4-1.1 | 0.12 | 36 | 1.0 | 0.6-1.7 | 0.97 | 20 | 0.9 | 0.5-1.8 | 0.81 | 0.51 |
| IL-12P40     | 1 | 223 | 78 |     |         |      | 53 |     |         |      | 31 |     |         |      |      |
|              | 2 | 78  | 28 | 0.9 | 0.6-1.6 | 0.81 | 18 | 1.0 | 0.5-1.8 | 0.98 | 10 | 0.9 | 0.4-2.1 | 0.87 | 0.99 |
| CXCL11-I-TAC | 1 | 151 | 55 |     |         |      | 30 |     |         |      | 16 |     |         |      |      |
|              | 2 | 150 | 50 | 0.9 | 0.6-1.5 | 0.70 | 41 | 1.5 | 0.9-2.7 | 0.13 | 25 | 1.4 | 0.7-2.9 | 0.31 | 0.23 |
| IL-6         | 1 | 199 | 71 |     |         |      | 45 |     |         |      | 30 |     |         |      |      |
|              | 2 | 102 | 35 | 0.9 | 0.6-1.5 | 0.78 | 26 | 1.2 | 0.7-2   | 0.63 | 11 | 0.7 | 0.3-1.5 | 0.38 | 0.56 |
| G-CSF        | 1 | 193 | 66 |     |         |      | 43 |     |         |      | 25 |     |         |      |      |
|              | 2 | 108 | 40 | 1.1 | 0.7-1.7 | 0.85 | 28 | 1.2 | 0.7-2.1 | 0.46 | 16 | 1.1 | 0.6-2.2 | 0.77 | 0.89 |
| IL-1B        | 1 | 206 | 66 |     |         |      | 46 |     |         |      | 32 |     |         |      |      |
|              | 2 | 95  | 40 | 1.3 | 0.8-2.1 | 0.29 | 25 | 1.2 | 0.7-2.1 | 0.58 | 9  | 0.6 | 0.3-1.3 | 0.22 | 0.22 |
| PYY          | 1 | 235 | 85 |     |         |      | 56 |     |         |      | 31 |     |         |      |      |
|              | 2 | 66  | 21 | 0.9 | 0.5-1.6 | 0.74 | 15 | 1.0 | 0.5-1.8 | 0.90 | 10 | 1.0 | 0.5-2.2 | 0.99 | 0.98 |
| IL-1A        | 1 | 238 | 84 |     |         |      | 57 |     |         |      | 34 |     |         |      |      |
|              | 2 | 63  | 22 | 0.9 | 0.5-1.6 | 0.80 | 14 | 0.9 | 0.5-1.7 | 0.73 | 7  | 0.8 | 0.3-2.0 | 0.69 | 0.98 |
| IL-1RA       | 1 | 216 | 72 |     |         |      | 48 |     |         |      | 35 |     |         |      |      |
|              | 2 | 85  | 34 | 1.1 | 0.7-1.9 | 0.61 | 23 | 1.2 | 0.7-2.2 | 0.49 | 6  | 0.4 | 0.2-1.1 | 0.08 | 0.12 |
| IL-2         | 1 | 211 | 72 |     |         |      | 47 |     |         |      | 32 |     |         |      |      |
|              | 2 | 90  | 34 | 1.1 | 0.7-1.7 | 0.80 | 24 | 1.2 | 0.7-2.1 | 0.54 | 9  | 0.7 | 0.3-1.5 | 0.33 | 0.46 |
| TNF-B        | 1 | 209 | 66 |     |         |      | 46 |     |         |      | 33 |     |         |      |      |
|              | 2 | 92  | 40 | 1.4 | 0.8-2.2 | 0.21 | 25 | 1.2 | 0.7-2.1 | 0.52 | 8  | 0.6 | 0.2-1.3 | 0.16 | 0.14 |

|             |   |     |    |     |         |      |    |     |         |      |    |     |         |      |      |
|-------------|---|-----|----|-----|---------|------|----|-----|---------|------|----|-----|---------|------|------|
| SDF-1A-B    | 1 | 151 | 61 |     |         |      | 41 |     |         |      | 18 |     |         |      |      |
|             | 2 | 150 | 45 | 0.8 | 0.5-1.2 | 0.25 | 30 | 0.7 | 0.4-1.2 | 0.22 | 23 | 1.3 | 0.7-2.5 | 0.47 | 0.31 |
| CCL20-MIP3A | 1 | 157 | 58 |     |         |      | 36 |     |         |      | 17 |     |         |      |      |
|             | 2 | 144 | 48 | 0.9 | 0.6-1.4 | 0.64 | 35 | 1.1 | 0.7-1.9 | 0.70 | 24 | 1.6 | 0.8-3.1 | 0.20 | 0.35 |
| ENA-78      | 1 | 151 | 62 |     |         |      | 39 |     |         |      | 17 |     |         |      |      |
|             | 2 | 150 | 44 | 0.6 | 0.4-1   | 0.06 | 32 | 0.9 | 0.5-1.6 | 0.66 | 24 | 1.4 | 0.7-2.9 | 0.34 | 0.12 |
| GM-CSF      | 1 | 180 | 72 |     |         |      | 42 |     |         |      | 23 |     |         |      |      |
|             | 2 | 121 | 34 | 0.7 | 0.4-1.1 | 0.10 | 29 | 1.1 | 0.6-1.9 | 0.77 | 18 | 1.1 | 0.6-2.2 | 0.70 | 0.23 |
| MIP-1D      | 1 | 151 | 64 |     |         |      | 38 |     |         |      | 23 |     |         |      |      |
|             | 2 | 150 | 42 | 0.6 | 0.4-1   | 0.06 | 33 | 0.8 | 0.5-1.4 | 0.39 | 18 | 0.9 | 0.5-1.7 | 0.71 | 0.66 |
| SIL-4R      | 1 | 151 | 52 |     |         |      | 39 |     |         |      | 21 |     |         |      |      |
|             | 2 | 150 | 54 | 1.1 | 0.7-1.7 | 0.82 | 32 | 0.9 | 0.5-1.5 | 0.60 | 20 | 0.9 | 0.5-1.7 | 0.73 | 0.80 |
| SILRII      | 1 | 151 | 54 |     |         |      | 36 |     |         |      | 19 |     |         |      |      |
|             | 2 | 150 | 52 | 1.0 | 0.6-1.6 | 0.99 | 35 | 1.1 | 0.6-1.8 | 0.85 | 22 | 1.1 | 0.6-2.2 | 0.73 | 0.95 |
| MDC         | 1 | 151 | 64 |     |         |      | 36 |     |         |      | 16 |     |         |      |      |
|             | 2 | 150 | 12 | 0.6 | 0.4-1.0 | 0.06 | 35 | 1.0 | 0.6-1.8 | 0.88 | 25 | 1.5 | 0.8-3.1 | 0.23 | 0.06 |
| EOTAXIN     | 1 | 151 | 55 |     |         |      | 35 |     |         |      | 24 |     |         |      |      |
|             | 2 | 150 | 51 | 1.0 | 0.6-1.5 | 0.87 | 36 | 0.9 | 0.6-1.6 | 0.83 | 17 | 0.7 | 0.3-1.3 | 0.26 | 0.63 |

Abbreviations: CLL/SLL, chronic lymphocytic leukemia / small lymphocytic lymphoma; DLBCL, diffuse large B-cell lymphoma; FL, follicular lymphoma; OR, odds ratio; CI, confidence interval.

\* Analytes with <50% of samples below the lower limit of detection (LLOD) were categorized using the median concentration among controls as cutpoint. Analytes with  $\geq$ 50% of samples <LLOD categorized as <LLOD vs. detectable.

†Odds ratios computed using polytomous regression with adjustment for age group at baseline, sex, race, study center, and blood collection date.
